# Supplementary material
Source: PubMed Central journal article supplement (PMC9075416)
Supplement: NIHMS1792094-supplement-Supplement.pdf [file NIHMS1792094-supplement-Supplement.pdf]

**Supplementary information**

---

**L1CAM is not associated with extracellular vesicles in human cerebrospinal fluid or plasma**

---

In the format provided by the authors and unedited

**Supplementary Figure 1: Linearity of dilution for Simoa assays**

- a) Endogenous dilution linearity (parallelism) in human CSF samples for each Simoa assay (CD9, CD63, CD81, L1CAM and albumin). Data represent the average of two technical replicates. Each dilution linearity experiment was performed on CSF from four individuals.
- b) Endogenous dilution linearity (parallelism) in human plasma samples for each Simoa assay (CD9, CD63, CD81, L1CAM and albumin). Data represent the average of two technical replicates. Each dilution linearity experiment was performed on plasma from four individuals.

a.

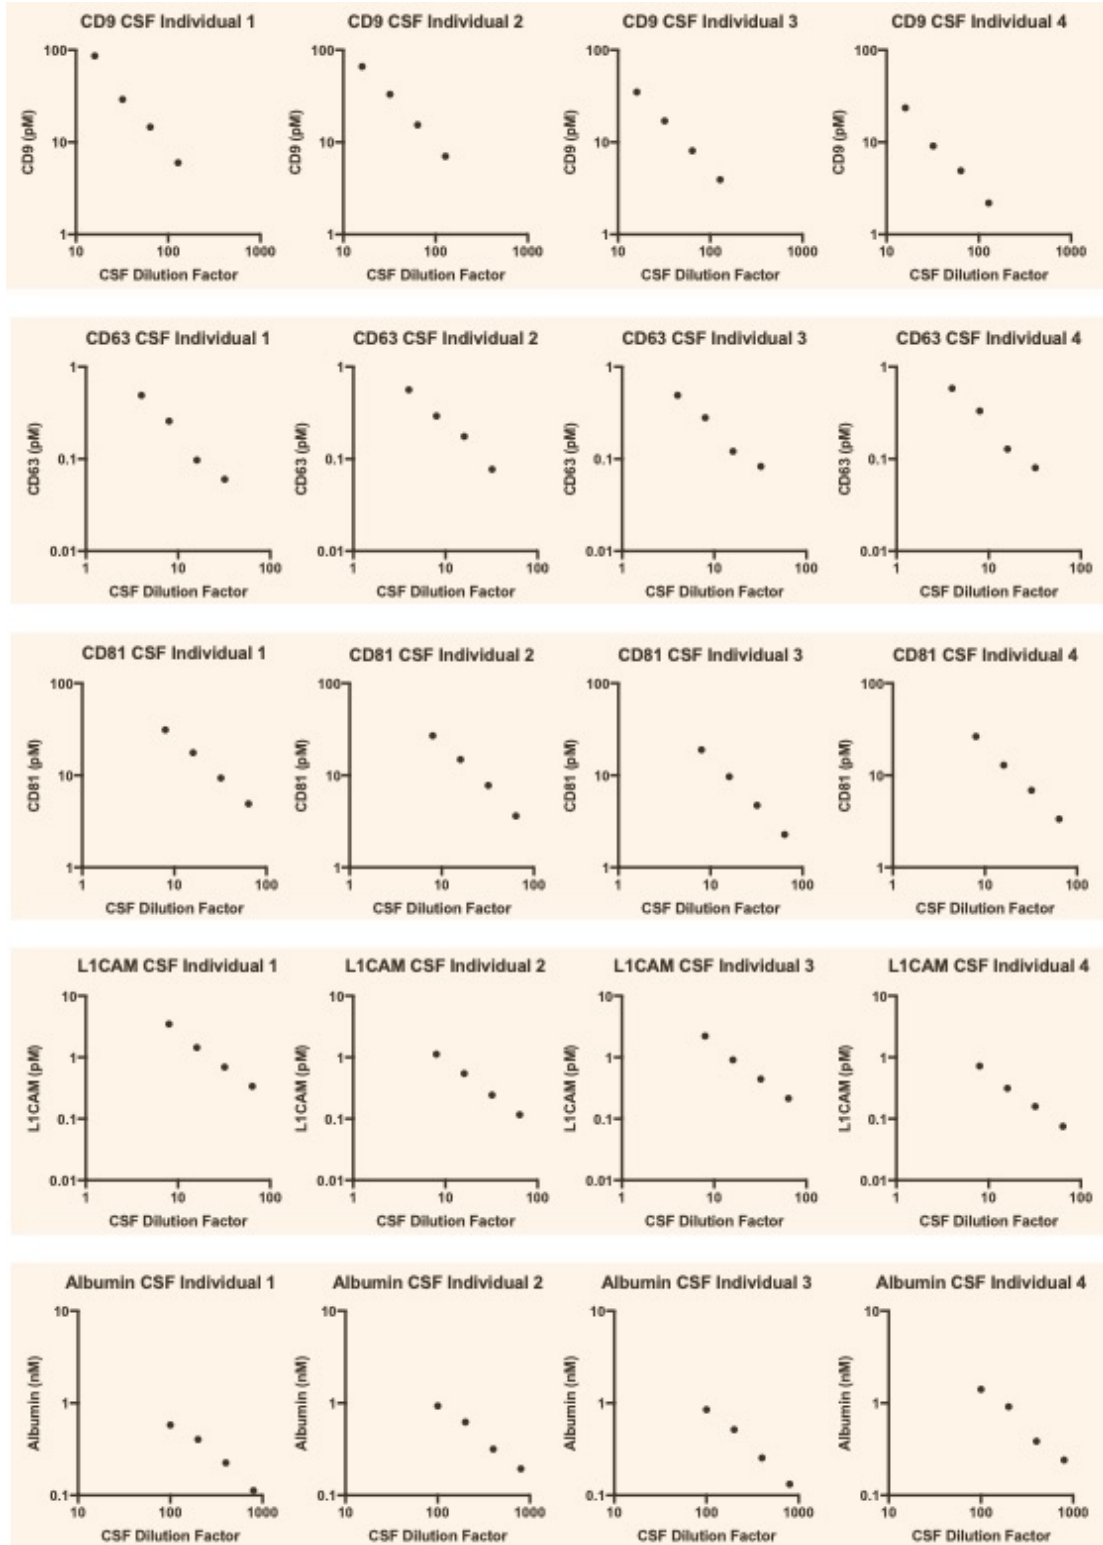

b.

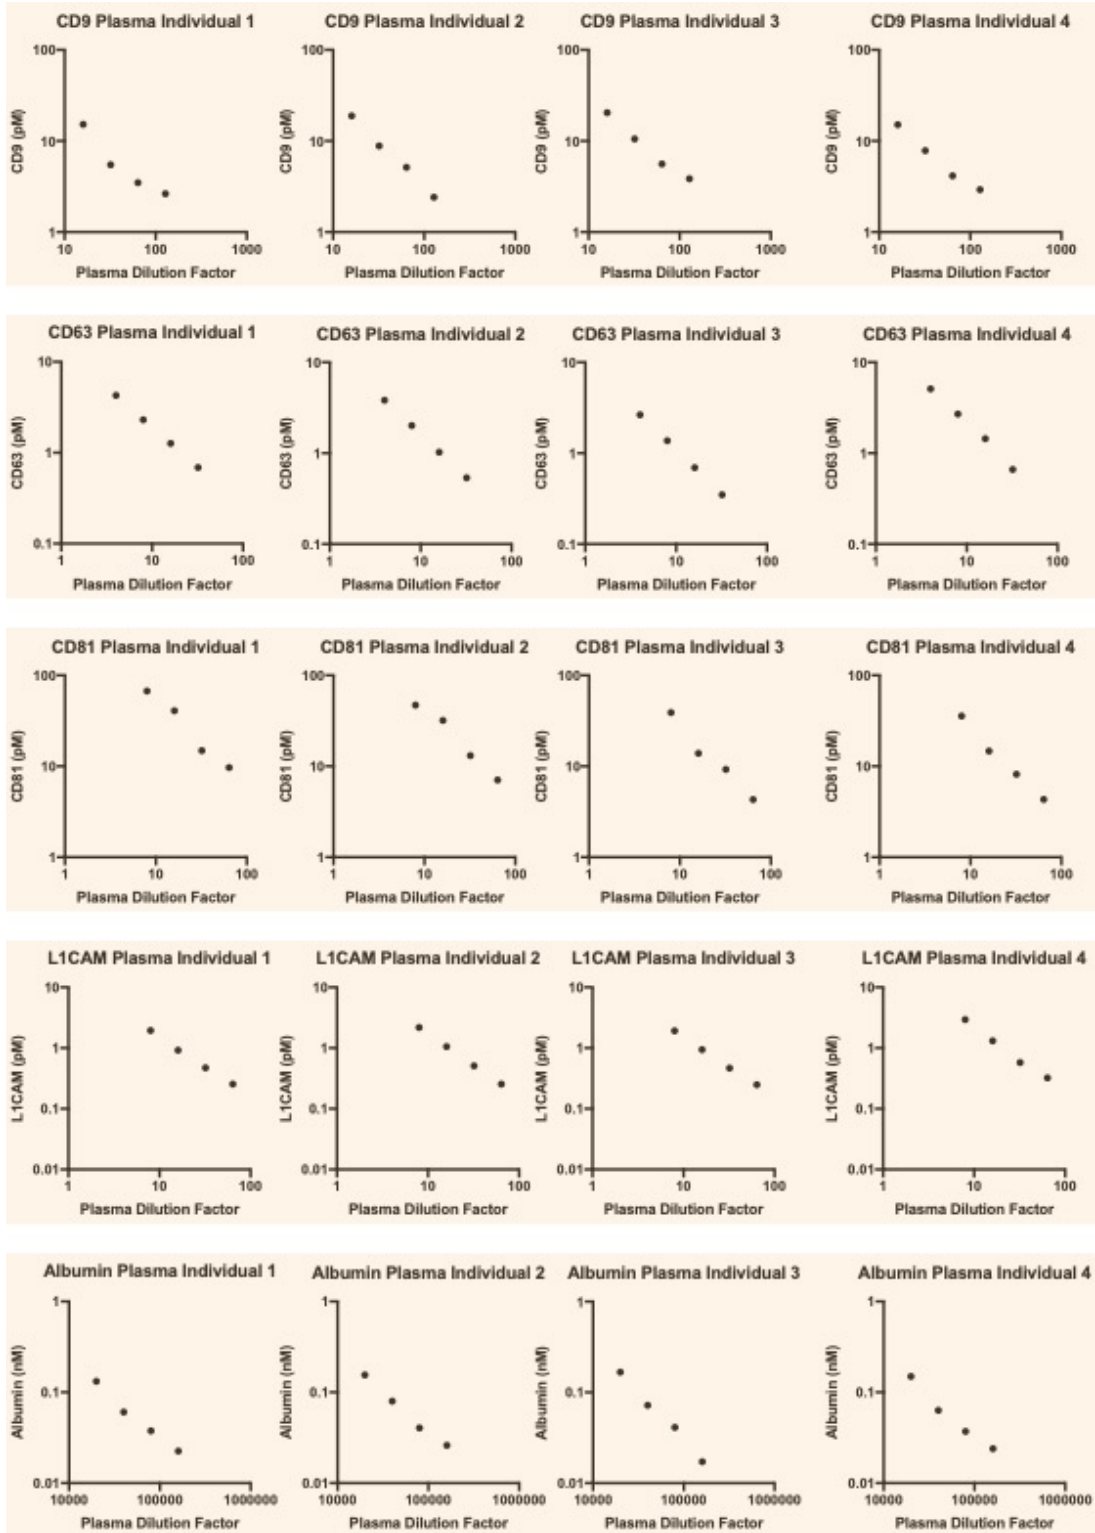

**Supplementary Table 1: Spike and recovery for Simoa assays**

Spike and recovery for each Simoa assay (CD9, CD63, CD81, L1CAM and albumin) in human plasma and CSF. Data are the average of four individual samples and two technical replicates.

| <b>Protein</b> | <b>CSF Dilution Factor/Spike</b> | <b>Average Recovery (4 Individuals)</b> | <b>Plasma Dilution Factor/Spike</b> | <b>Average Recovery (4 Individuals)</b> |
|----------------|----------------------------------|-----------------------------------------|-------------------------------------|-----------------------------------------|
| <b>CD9</b>     | 32x+500                          | 86%                                     | 32x+500                             | 79%                                     |
|                | 32x+1000                         | 101%                                    | 32x+1000                            | 74%                                     |
| <b>CD63</b>    | 16x+10                           | 106%                                    | 16x+10                              | 83%                                     |
|                | 16x+50                           | 105%                                    | 16x+50                              | 74%                                     |
| <b>CD81</b>    | 32x+500                          | 104%                                    | 32x+500                             | 106%                                    |
|                | 32x+1000                         | 101%                                    | 32x+1000                            | 94%                                     |
| <b>Albumin</b> | 400x+50000                       | 90%                                     | 80000x+50000                        | 85%                                     |
|                | 400x+100000                      | 85%                                     | 80000x+100000                       | 90%                                     |
| <b>L1CAM</b>   | 32x+500                          | 106%                                    | 64x+500                             | 102%                                    |
|                | 32x+1000                         | 107%                                    | 64x+1000                            | 98%                                     |

**Supplementary Figure 2: Comparison of ELISA and Simoa for EV quantification**

- a) Standard ELISA calibration curve for CD9 (left) and measurement of plasma (center) and CSF (right) SEC fractions using this assay. Data represent the average of two technical replicates.
- b) Simoa calibration curve for CD9 (left) and measurement of plasma (center) and CSF (right) SEC fractions using this assay. Data represent the average of two technical replicates.
- c) Standard ELISA calibration curve for CD63 (left) and measurement of plasma (center) and CSF (right) SEC fractions using this assay. Data represent the average of two technical replicates.
- d) Simoa calibration curve for CD63 (left) and measurement of plasma (center) and CSF (right) SEC fractions using this assay. Data represent the average of two technical replicates.
- e) Standard ELISA calibration curve for CD81 (left) and measurement of plasma (center) and CSF (right) SEC fractions using this assay. Data represent the average of two technical replicates.
- f) Simoa calibration curve for CD81 (left) and measurement of plasma (center) and CSF (right) SEC fractions using this assay. Data represent the average of two technical replicates.
- g) Western blots of plasma (left) and CSF (right) SEC fractions.

CD9

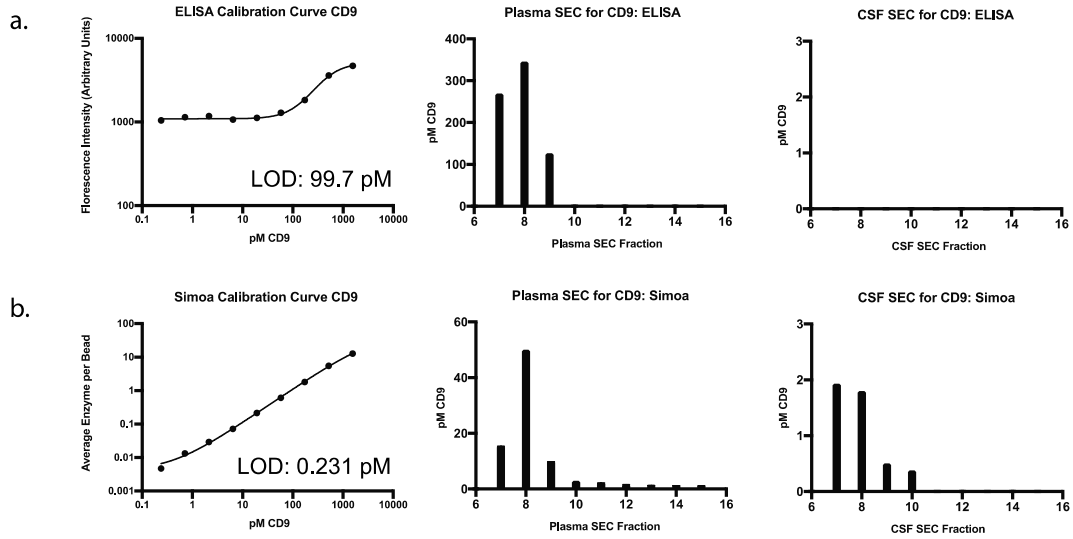

CD63

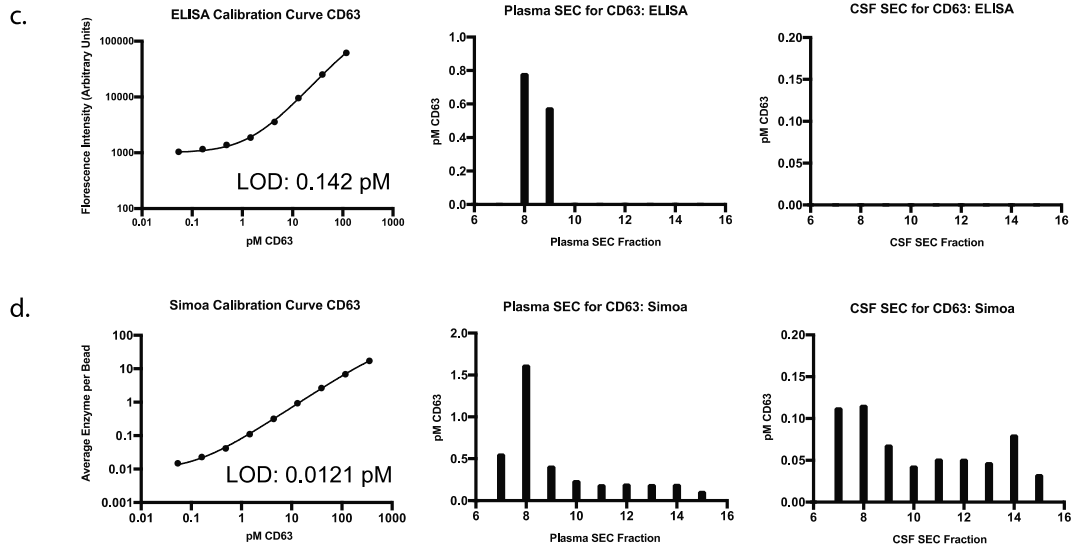

CD81

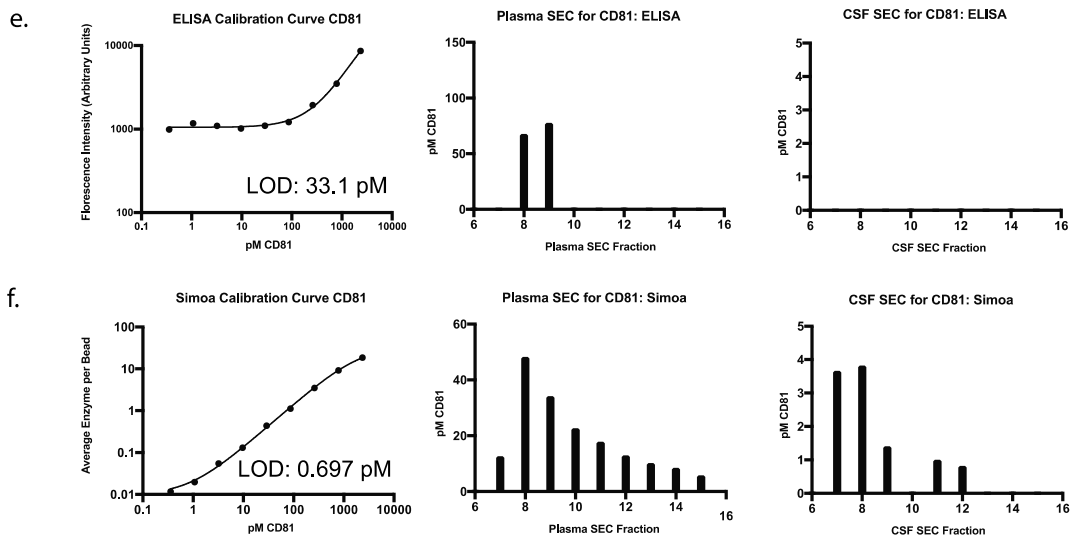

g.

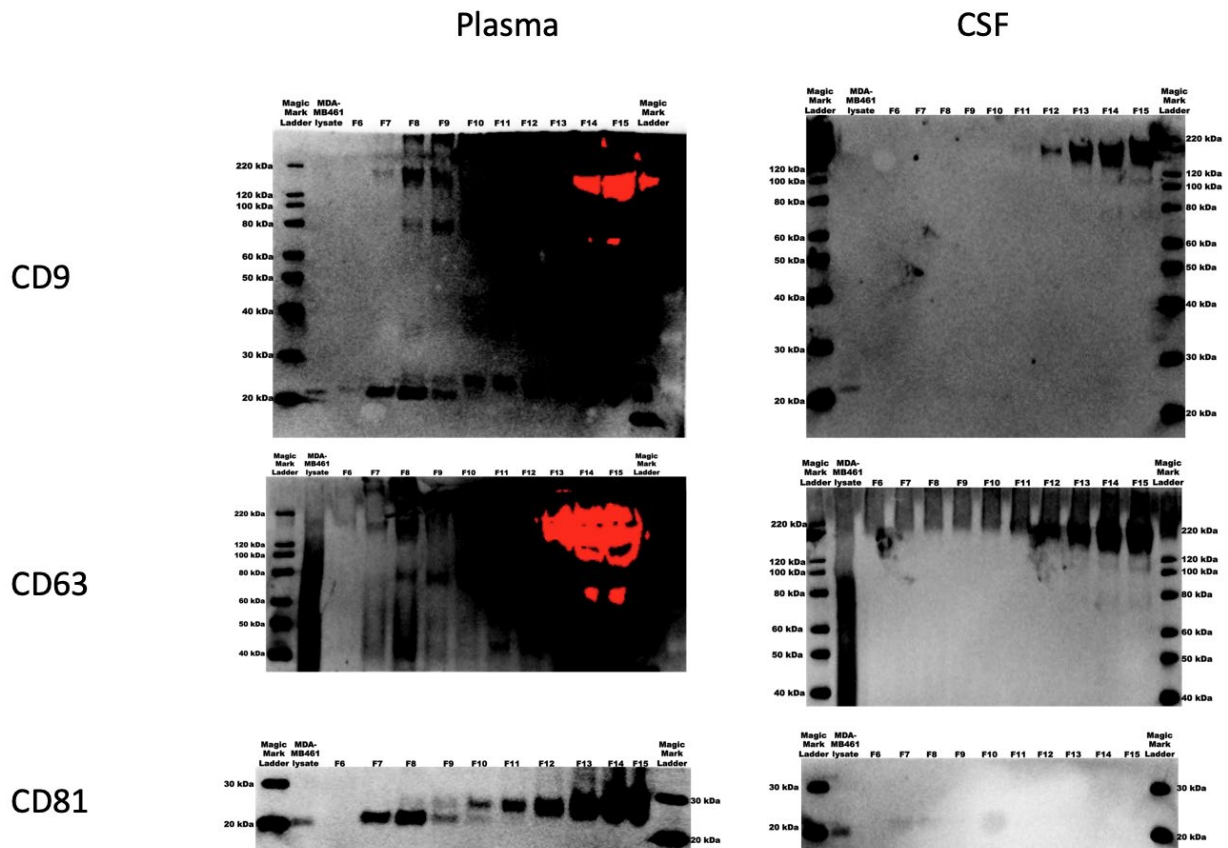

**Supplementary Note 1: Citations for manuscripts that utilize L1CAM as a handle for NDEV isolation<sup>1-45</sup>**

- 1 Shi, M. *et al.* Plasma exosomal alpha-synuclein is likely CNS-derived and increased in Parkinson's disease. *Acta Neuropathol* **128**, 639-650, doi:10.1007/s00401-014-1314-y (2014).
- 2 Shi, M. *et al.* CNS tau efflux via exosomes is likely increased in Parkinson's disease but not in Alzheimer's disease. *Alzheimers Dement* **12**, 1125-1131, doi:10.1016/j.jalz.2016.04.003 (2016).
- 3 Sun, B., Dalvi, P., Abadjian, L., Tang, N. & Pulliam, L. Blood neuron-derived exosomes as biomarkers of cognitive impairment in HIV. *AIDS* **31**, F9-F17, doi:10.1097/QAD.0000000000001595 (2017).
- 4 Goetzl, E. J., Abner, E. L., Jicha, G. A., Kapogiannis, D. & Schwartz, J. B. Declining levels of functionally specialized synaptic proteins in plasma neuronal exosomes with progression of Alzheimer's disease. *FASEB J* **32**, 888-893, doi:10.1096/fj.201700731R (2018).



- 5 Goetzl, E. J. *et al.* Decreased synaptic proteins in neuronal exosomes of frontotemporal dementia and Alzheimer's disease. *FASEB J* **30**, 4141-4148, doi:10.1096/fj.201600816R (2016).
- 6 Guix, F. X. *et al.* Detection of Aggregation-Competent Tau in Neuron-Derived Extracellular Vesicles. *Int J Mol Sci* **19**, doi:10.3390/ijms19030663 (2018).
- 7 Goetzl, E. J. *et al.* Low neural exosomal levels of cellular survival factors in Alzheimer's disease. *Ann Clin Transl Neurol* **2**, 769-773, doi:10.1002/acn3.211 (2015).
- 8 Mustapic, M. *et al.* Plasma Extracellular Vesicles Enriched for Neuronal Origin: A Potential Window into Brain Pathologic Processes. *Front Neurosci* **11**, 278, doi:10.3389/fnins.2017.00278 (2017).
- 9 Suire, C. N. *et al.* Walking speed decline in older adults is associated with elevated pro-BDNF in plasma extracellular vesicles. *Exp Gerontol* **98**, 209-216, doi:10.1016/j.exger.2017.08.024 (2017).
- 10 Abner, E. L., Jicha, G. A., Shaw, L. M., Trojanowski, J. Q. & Goetzl, E. J. Plasma neuronal exosomal levels of Alzheimer's disease biomarkers in normal aging. *Ann Clin Transl Neurol* **3**, 399-403, doi:10.1002/acn3.309 (2016).
- 11 Fiandaca, M. S. *et al.* Identification of preclinical Alzheimer's disease by a profile of pathogenic proteins in neurally derived blood exosomes: A case-control study. *Alzheimers Dement* **11**, 600-607 e601, doi:10.1016/j.jalz.2014.06.008 (2015).
- 12 Gill, J. *et al.* Higher exosomal tau, amyloid-beta 42 and IL-10 are associated with mild TBIs and chronic symptoms in military personnel. *Brain Inj* **32**, 1277-1284, doi:10.1080/02699052.2018.1471738 (2018).
- 13 Goetzl, E. J. *et al.* Altered levels of plasma neuron-derived exosomes and their cargo proteins characterize acute and chronic mild traumatic brain injury. *FASEB J* **33**, 5082-5088, doi:10.1096/fj.201802319R (2019).
- 14 Goetzl, L., Darbinian, N. & Goetzl, E. J. Novel window on early human neurodevelopment via fetal exosomes in maternal blood. *Ann Clin Transl Neurol* **3**, 381-385, doi:10.1002/acn3.296 (2016).
- 15 Hamlett, E. D. *et al.* Neuronal exosomes reveal Alzheimer's disease biomarkers in Down syndrome. *Alzheimers Dement* **13**, 541-549, doi:10.1016/j.jalz.2016.08.012 (2017).
- 16 Kapogiannis, D. *et al.* Dysfunctionally phosphorylated type 1 insulin receptor substrate in neural-derived blood exosomes of preclinical Alzheimer's disease. *FASEB J* **29**, 589-596, doi:10.1096/fj.14-262048 (2015).
- 17 Patterson, S. A., Deep, G. & Brinkley, T. E. Detection of the receptor for advanced glycation endproducts in neuronally-derived exosomes in plasma. *Biochem Biophys Res Commun* **500**, 892-896, doi:10.1016/j.bbrc.2018.04.181 (2018).
- 18 Winston, C. N. *et al.* Prediction of conversion from mild cognitive impairment to dementia with neuronally derived blood exosome protein profile. *Alzheimers Dement (Amst)* **3**, 63-72, doi:10.1016/j.dadm.2016.04.001 (2016).
- 19 Winston, C. N., Goetzl, E. J., Baker, L. D., Vitiello, M. V. & Rissman, R. A. Growth Hormone-Releasing Hormone Modulation of Neuronal Exosome Biomarkers in Mild Cognitive Impairment. *J Alzheimers Dis* **66**, 971-981, doi:10.3233/JAD-180302 (2018).

- 20 Zhao, Z. H. *et al.* Increased DJ-1 and alpha-Synuclein in Plasma Neural-Derived Exosomes as Potential Markers for Parkinson's Disease. *Front Aging Neurosci* **10**, 438, doi:10.3389/fnagi.2018.00438 (2018).
- 21 Kapogiannis, D. *et al.* Association of Extracellular Vesicle Biomarkers With Alzheimer Disease in the Baltimore Longitudinal Study of Aging. *JAMA Neurol*, doi:10.1001/jamaneurol.2019.2462 (2019).
- 22 Chawla, S. *et al.* Extracellular vesicles reveal abnormalities in neuronal iron metabolism in restless legs syndrome. *Sleep* **42**, doi:10.1093/sleep/zsz079 (2019).
- 23 Goetzl, E. J., Peltz, C. B., Mustapic, M., Kapogiannis, D. & Yaffe, K. Neuron-Derived Plasma Exosome Proteins after Remote Traumatic Brain Injury. *J Neurotrauma*, doi:10.1089/neu.2019.6711 (2019).
- 24 Mullins, R. J., Mustapic, M., Goetzl, E. J. & Kapogiannis, D. Exosomal biomarkers of brain insulin resistance associated with regional atrophy in Alzheimer's disease. *Hum Brain Mapp* **38**, 1933-1940, doi:10.1002/hbm.23494 (2017).
- 25 Hiramoto, J. S. *et al.* Acute Insulin Resistance and Rapid Alterations in Neuronal Derived Blood Exosome Concentration After Branched Endovascular Aortic Aneurysm Repair. *Eur J Vasc Endovasc Surg*, doi:10.1016/j.ejvs.2019.10.007 (2019).
- 26 Winston, C. N. *et al.* Assessing Neuronal and Astrocyte Derived Exosomes From Individuals With Mild Traumatic Brain Injury for Markers of Neurodegeneration and Cytotoxic Activity. *Front Neurosci* **13**, 1005, doi:10.3389/fnins.2019.01005 (2019).
- 27 Cha, D. J. *et al.* miR-212 and miR-132 Are Downregulated in Neurally Derived Plasma Exosomes of Alzheimer's Patients. *Front Neurosci* **13**, 1208, doi:10.3389/fnins.2019.01208 (2019).
- 28 Rani, K. *et al.* Neuronal exosomes in saliva of Parkinson's disease patients: A pilot study. *Parkinsonism Relat Disord* **67**, 21-23, doi:10.1016/j.parkreldis.2019.09.008 (2019).
- 29 Si, X. *et al.* Central Nervous System-Derived Exosomal Alpha-Synuclein in Serum May Be a Biomarker in Parkinson's Disease. *Neuroscience* **413**, 308-316, doi:10.1016/j.neuroscience.2019.05.015 (2019).
- 30 Agliardi, C. *et al.* SNAP-25 in Serum Is Carried by Exosomes of Neuronal Origin and Is a Potential Biomarker of Alzheimer's Disease. *Mol Neurobiol* **56**, 5792-5798, doi:10.1007/s12035-019-1501-x (2019).
- 31 Jia, L. *et al.* Concordance between the assessment of Abeta42, T-tau, and P-T181-tau in peripheral blood neuronal-derived exosomes and cerebrospinal fluid. *Alzheimers Dement* **15**, 1071-1080, doi:10.1016/j.jalz.2019.05.002 (2019).
- 32 Kapogiannis, D. *et al.* Insulin-signaling abnormalities in drug-naive first-episode schizophrenia: Transduction protein analyses in extracellular vesicles of putative neuronal origin. *Eur Psychiatry* **62**, 124-129, doi:10.1016/j.eurpsy.2019.08.012 (2019).
- 33 Katsu, M. *et al.* MicroRNA expression profiles of neuron-derived extracellular vesicles in plasma from patients with amyotrophic lateral sclerosis. *Neurosci Lett* **708**, 134176, doi:10.1016/j.neulet.2019.03.048 (2019).
- 34 Sun, B., Fernandes, N. & Pulliam, L. Profile of neuronal exosomes in HIV cognitive impairment exposes sex differences. *AIDS* **33**, 1683-1692, doi:10.1097/QAD.0000000000002272 (2019).

- 35 Athauda, D. *et al.* Utility of Neuronal-Derived Exosomes to Examine Molecular Mechanisms That Affect Motor Function in Patients With Parkinson Disease: A Secondary Analysis of the Exenatide-PD Trial. *JAMA Neurol* **76**, 420-429, doi:10.1001/jamaneurol.2018.4304 (2019).
- 36 Madhu, L. N. *et al.* Neuroinflammation in Gulf War Illness is linked with HMGB1 and complement activation, which can be discerned from brain-derived extracellular vesicles in the blood. *Brain Behav Immun* **81**, 430-443, doi:10.1016/j.bbi.2019.06.040 (2019).
- 37 Jiang, C. *et al.* Serum neuronal exosomes predict and differentiate Parkinson's disease from atypical parkinsonism. *J Neurol Neurosurg Psychiatry*, doi:10.1136/jnnp-2019-322588 (2020).
- 38 Kodidela, S. *et al.* Circulatory Astrocyte and Neuronal EVs as Potential Biomarkers of Neurological Dysfunction in HIV-Infected Subjects and Alcohol/Tobacco Users. *Diagnostics (Basel)* **10**, doi:10.3390/diagnostics10060349 (2020).
- 39 Mansur, R. B. *et al.* Extracellular Vesicle Biomarkers Reveal Inhibition of Neuroinflammation by Infliximab in Association with Antidepressant Response in Adults with Bipolar Depression. *Cells* **9**, doi:10.3390/cells9040895 (2020).
- 40 Zou, J. *et al.* Long Noncoding RNA POU3F3 and alpha-Synuclein in Plasma L1CAM Exosomes Combined with beta-Glucocerebrosidase Activity: Potential Predictors of Parkinson's Disease. *Neurotherapeutics*, doi:10.1007/s13311-020-00842-5 (2020).
- 41 Yuan, Y. *et al.* Exosome alpha-Synuclein Release in Plasma May be Associated With Postoperative Delirium in Hip Fracture Patients. *Front Aging Neurosci* **12**, 67, doi:10.3389/fnagi.2020.00067 (2020).
- 42 Niu, M. *et al.* A longitudinal study on alpha-synuclein in plasma neuronal exosomes as a biomarker for Parkinson's disease development and progression. *Eur J Neurol* **27**, 967-974, doi:10.1111/ene.14208 (2020).
- 43 Banack, S. A., Dunlop, R. A. & Cox, P. A. An miRNA fingerprint using neural-enriched extracellular vesicles from blood plasma: towards a biomarker for amyotrophic lateral sclerosis/motor neuron disease. *Open Biol* **10**, 200116, doi:10.1098/rsob.200116 (2020).
- 44 Bhargava, P. *et al.* Synaptic and complement markers in extracellular vesicles in multiple sclerosis. *Mult Scler*, 1352458520924590, doi:10.1177/1352458520924590 (2020).
- 45 Nogueras-Ortiz, C. J. *et al.* Astrocyte- and Neuron-Derived Extracellular Vesicles from Alzheimer's Disease Patients Effect Complement-Mediated Neurotoxicity. *Cells* **9**, doi:10.3390/cells9071618 (2020).
